# Supplementary material for: Replication and Expression of the Consensus Genome of Hepatitis B Virus Genotype C from the Chinese Population
Source: MDPI journal article supplement (doi:10.3390/v15122302), 2023-11-23
Supplement: s1 [file s1]

Supplementary Figure

Supplementary Figure S1

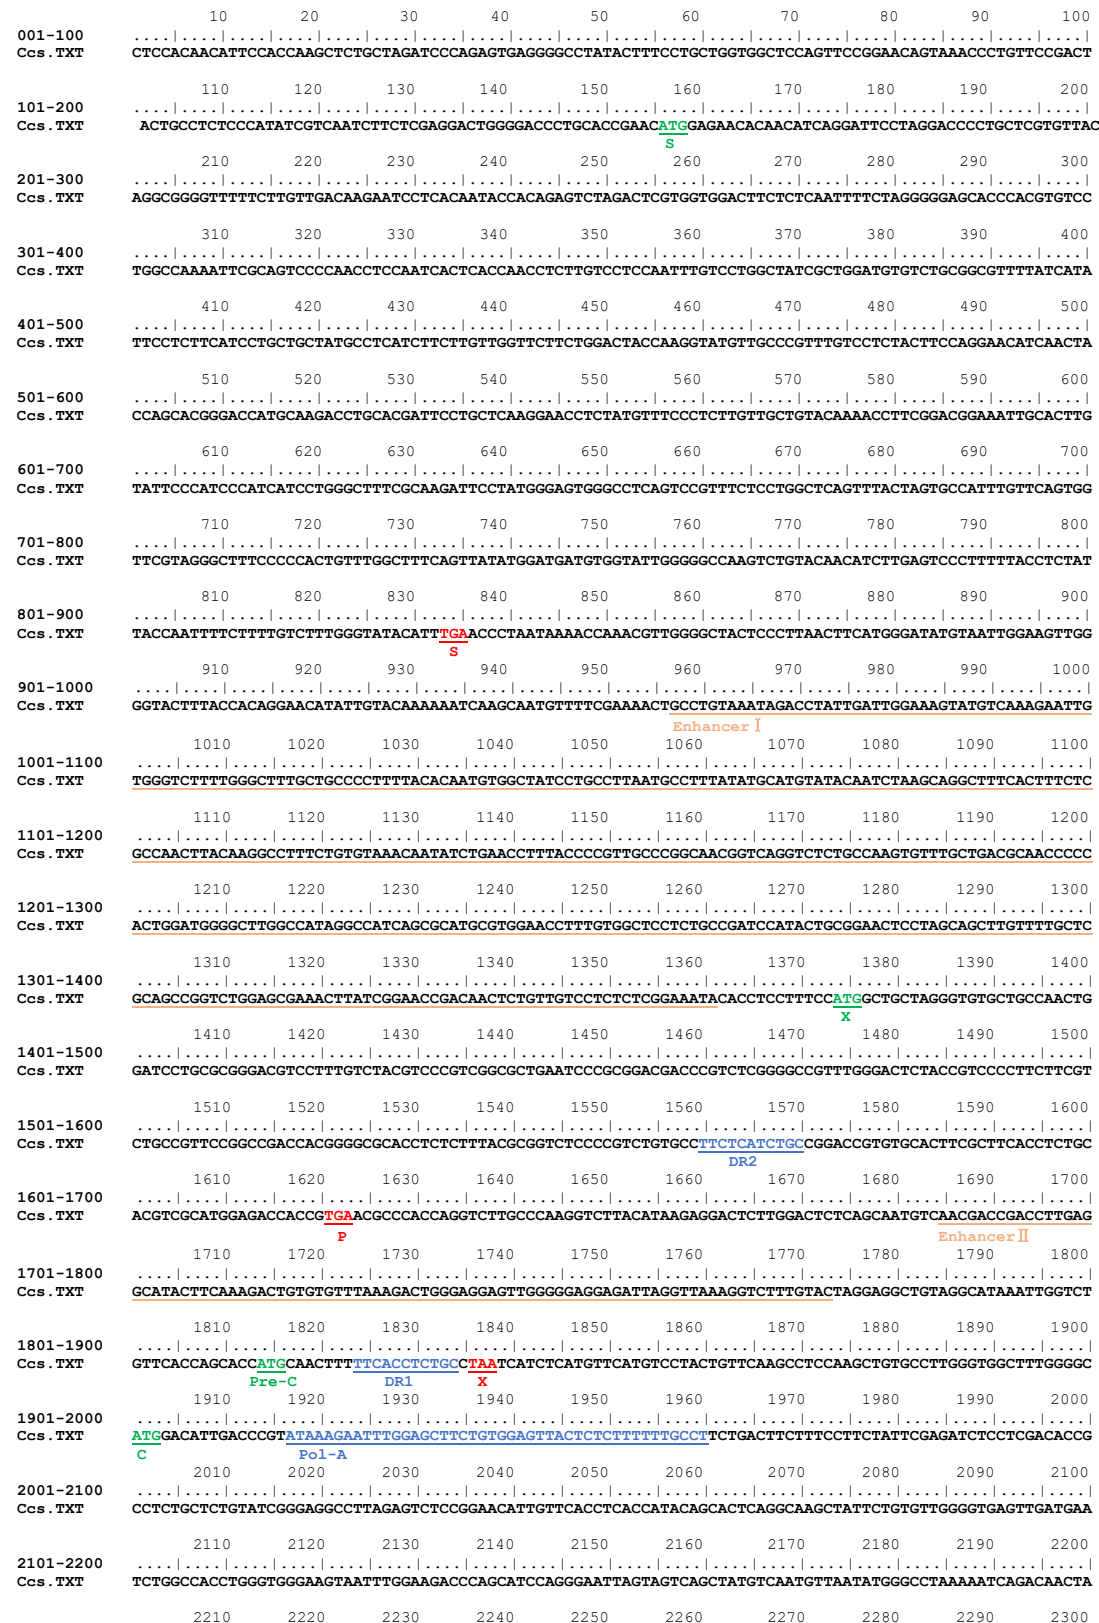

2201-2300  
Ccs. TXT

2301-2400  
Ccs. TXT

2401-2500  
Ccs. TXT

2501-2600  
Ccs. TXT

2601-2700  
Ccs. TXT

2701-2800  
Ccs. TXT

2801-2900  
Ccs. TXT

2901-3000  
Ccs. TXT

3001-3100  
Ccs. TXT

3101-3200  
Ccs. TXT

3201-3215  
Ccs. TXT

Pre-S1

Pre-S2

**Figure S1. The established consensus sequence of HBV genotype C.** The full-length consensus genome is composed of 3215 nucleotides. Start codon was marked with green. Stop codon was marked with red. DR1, DR2, Pol-A were marked with blue. Two enhancers were marked with orange. Four promoters (core promoter, CP, nt1613-1849; PreS1 promoter, SP I, nt2718-2808; PreS2 promoter, SP II, nt2983-3210; X promoter, XP, nt1171-1361).

## Supplementary Tables

**Supplementary Table S1.** The translated amino acid sequences of the four open reading frames (*P*, *preS/S*, *preCore/Core*, *X*) from the consensus sequence of genotype C.

| Title               | Gene locus             | Amino Acid sequences                                                                                                                                                                                                                                                                                                                                                                                                                                                                                                                                                                                                                                                                                                                                                                                                                                                                                                                                                                                                                                            |
|---------------------|------------------------|-----------------------------------------------------------------------------------------------------------------------------------------------------------------------------------------------------------------------------------------------------------------------------------------------------------------------------------------------------------------------------------------------------------------------------------------------------------------------------------------------------------------------------------------------------------------------------------------------------------------------------------------------------------------------------------------------------------------------------------------------------------------------------------------------------------------------------------------------------------------------------------------------------------------------------------------------------------------------------------------------------------------------------------------------------------------|
| Polymerase (843 aa) | nt(2307..3215,1..1623) | 1 MPLSYQHFRK LLLLDDEAGP LEEELPRLAD EGLNRRVAED LNLGNLNSVI PWTHKVG NFT<br>61 GLYSSTVPVF NPEWQTPSFP HIHLQEDIIN RCQQYVGPLT VNEKRRLKLI MPARFYPNLT<br>121 KYLPLDKGIK PYYPEHAVNH YFKTRHYLHT LWKAGILYKR ETTRSASFQ SPYSWEQELQ<br>181 HGRLVFQST RHGDESFCQ SSGILSRSPV GPCVRSQ LKQ SRLGLPQQG SLARGKSGRS<br>241 GSIRARVHPT TRRSFGVEPS GSGHIDNSAS STSSCLHQSA VRKTAYSHLS TSKRQSSSGH<br>301 AVELHNIPPS SARSQSEGPI LSCWWLQFRN SKPCSDYCLS HIVNLLEDWG PCTEHGEHNI<br>361 RIPRTPARVT GGVFLVDKNP HNTTESRLVV DFSQFSRGST HVSWPKF AVP NLQSLTNLLS<br>421 SNLSWLSLDV SAAFYHIPLH PAAMPHLLVG SSGLPYRVAR LSSTSRNIN YQHGTMQDLHD<br>481 SCSRNLVYSL LLLYKTFGRK LHLYSHPIIL GFRKIPMGVG LSPFLLAQFT SAICSVVRR<br>541 FPHCLAFSYM DDVVLGAKSV QHLESFTSI TNFLLSLGIH LNPNTKRWG YSLNFMGYVI<br>601 GSWGTLPEQH IVQKIKQCFR KLPVNRPIDW KVCQRIVGLL GFAAPFTQCG YPALMPLYAC<br>661 IQSKQAFTFS PTYKAF LCKQ YLNLYPVARQ RSLG LCVFAD ATPGWGLAI GHQMRGTFV<br>721 APLPIHTAEL LAACFARSRS GAKLIGTDNS VVLSRKYTSF PWLLGCAANW ILRGTSFVYV<br>781 PSALNPADDP SRGRLGLYRP LLRLPFRPTT GRTSLYAVSP SVP SHLPDRV HFASPLHVAW<br>841 RPP |

|                                     |                       |                                                                                                                                                                                                                                                                                                                                                                                                                                                                                            |
|-------------------------------------|-----------------------|--------------------------------------------------------------------------------------------------------------------------------------------------------------------------------------------------------------------------------------------------------------------------------------------------------------------------------------------------------------------------------------------------------------------------------------------------------------------------------------------|
| Large S protein<br>(400 aa)         | nt(2848..3215,1..835) | 1MGGWSSKPRQ GMCTNLSVPN PLGFFPDHQL DPAFGANSNN PDWDFNPNKD HWPEANQVGA<br>61 GAFGPGFTTP HGGLLGWSPQ AQGILTTPVA APPPASTNRQ SCRQPTPISP PLRDSHPQAM<br>121 QWNSTTFHQALDPRVRGLY FPAGGSSGT VNPVPTTASP ISSIFSRTGD PAPNMENTTS<br>181 GFLGPLLVQL AGFFLLTRIL TIPQSLDSWW TSLNFLGGAP TCPGQNSQSP TSNHSPSTSC<br>241 PICPGYRWMCLRRFIIFLFI LLLCLIFLLV LLDYQGMLPV CPLLPSTSTT STGPCKTCTI<br>301 PAQGTSMFPS CCCTKPSDGN CTCIPISSW AFARFLWEWA SVRFSWLSLL VPFVQWVFG<br>361 SPTVWLSVIW MMWYWGPSLY NILSPFLPL PIFFCLWVYI |
| middle S protein<br>(281 aa)        | nt(3205..3215,1..835) | 1MQWNSTTFHQ ALLDPRVRGL YFPAGGSSGT TVNPVPTTAS PISSIFSRTG DPAPNMENTT<br>61 SGFLGPLLVQL QAGFFLLTRI LTIPQSLDSW WTSNLFLLGA PTCGQNSQS PTSNHSPTSC<br>121 PPICPGYRWM CLRRFIIFLF ILLCLIFLL VLLDYQGMLPV VCPLLPSTST TSTGPCKTCT<br>181 IPAQGTSMFP SCCCTKPSDG NCTCIPISS WAFARFLWEW ASVRFSWLSL VPFVQWVFG<br>241 LSPTVWLSVI WMMWYWGPSL YNILSPFLPL PIFFCLWVYI                                                                                                                                              |
| S protein<br>(226 aa)               | nt(155..835)          | 1MENTTSGFLG PLLVLQAGFF LLTRILTIQ SLDSWWTSLN FLGGAPTCG QNSQSPTSNNH<br>61 SPTSCPPICP GYRWMCLRRF IIFLLILLCL LIFLLVLLDY QGMLPVCPLL PGTSTTSTGP<br>121 CKTCTIPAQG TSMFPSCCCT KPSDGNCTCI PIPSSWAFAR FLWEWASVRF SWLSLLVPFV<br>181 QWVGLSPTV WLSVIWMMWY WGPSLYNILS PFLPLPIFF CLWVYI                                                                                                                                                                                                                 |
| X protein<br>(154 aa)               | nt(1374..1838)        | 1MAARVCCQLD PARDVLCLRP VGAESRGRPV SGPFGLTLP SSSAVPADHG AHLRLRGLPV<br>61 CAFSSAGPCA LRFTSARRME TTVNAHQVLP KVLHKRTLGL SAMSTTDLEA YFKDCVFKDW<br>121 EELGFEIRLK VFLGGCRHK LVCSAPPCNF FTSA                                                                                                                                                                                                                                                                                                      |
| precore/core<br>protein<br>(212 aa) | nt(1814..2452)        | 1MQLFHLCLII SCSCPTVQAS KLCGLWLGWM DIDPYKEFGA SVELLSFLPS DFFPSIRDLL<br>61 DTASALYREA LESPEHCSPH HTALRQAILC WGELMNLATW VGSNLEDPAS RELVVSYNV<br>121 NMGLKIRQLL WFHISCLTFG RETVLEYLVS FGVWIRTPPA YRPPNAPILS TLPETTIVRR<br>181 RGRSPRRRTP SPRRRRSQSP RRRRSQSRES QC                                                                                                                                                                                                                              |
| Core protein<br>(183 aa)            | nt(1901..2452)        | 1MDIDPYKEFG ASVELLSFLP SDFPISIRD LDTASALYRE ALESPEHCSP HHTALRQAIL<br>61 CWGELMNLAT VVGSNLEDP SRELVSYSYN VNMGLKIRQL LWFHISCLTF GRETVLEYLV<br>121 SFGVWIRTPP AYRPPNAPIL STLPETTIVR RGRSPRRRT PSRRRSQS PRRRRSQSRE<br>181 SQC                                                                                                                                                                                                                                                                  |

## Supplementary Table 2

### Positional frequency report of 138 HBV genotype C genomes.

The detailed data were provided in Excel.

### Supplementary Table S3. Serum data of the mice recipients injected with pHBV1.3C.

| Marker<br>(Unit)   | BALB/c<br>mouse | Different kinetics of serum markers at the indicated days with pHBV1.3C hydrodynamic injection |          |           |           |          |         |
|--------------------|-----------------|------------------------------------------------------------------------------------------------|----------|-----------|-----------|----------|---------|
|                    |                 | 1                                                                                              | 4        | 7         | 14        | 28       | 42      |
| HBsAg<br>(IU/mL)   | #1              | 12.78                                                                                          | 173.95   | 190.00    | 1.24      | *        | *       |
|                    | #2              | 11.67                                                                                          | 85.83    | 131.17    | 0.85      | 0.15     | *       |
|                    | #3              | 4.65                                                                                           | 39.40    | 68.36     | 0.14      | /        | /       |
|                    | #4              | 11.72                                                                                          | 65.56    | 111.10    | 58.08     | 19.18    | 4.7     |
|                    | #5              | 3.98                                                                                           | 40.61    | 86.23     | /         | /        | /       |
|                    | #6              | 21.32                                                                                          | /        | /         | /         | /        | /       |
| HBeAg<br>(COI)     | #1              | 10.67                                                                                          | 37.62    | 25.13     | 0.31      | 0.31     | 0.29    |
|                    | #2              | 5.15                                                                                           | 10.21    | 14.55     | 3.80      | 0.88     | 0.13    |
|                    | #3              | 2.74                                                                                           | 4.97     | 4.62      | 0.59      | /        | /       |
|                    | #4              | 4.37                                                                                           | 7.00     | 9.06      | 11.61     | 5.44     | 2.57    |
|                    | #5              | 4.25                                                                                           | 3.63     | 6.36      | /         | /        | /       |
|                    | #6              | 2.67                                                                                           | /        | /         | /         | /        | /       |
| ALT<br>(IU/mL)     | #1              | 694                                                                                            | 2        | 3         | 2         | 1        | 1       |
|                    | #2              | 107                                                                                            | 2        | 1         | 1         | 2        | 3       |
|                    | #3              | 160                                                                                            | 6        | 3         | 2         | /        | /       |
|                    | #4              | 107                                                                                            | 2        | 2         | 1         | 1        | 2       |
|                    | #5              | 181                                                                                            | 5        | 4         | /         | /        | /       |
|                    | #6              | 65                                                                                             | /        | /         | /         | /        | /       |
| HBV DNA<br>(IU/mL) | #1              | 211274.63                                                                                      | 17900.70 | 43779.01  | N         | N        | N       |
|                    | #2              | 827022.20                                                                                      | 44660.18 | 714040.90 | 1026.92   | N        | N       |
|                    | #3              | 602078.80                                                                                      | 42710.64 | 102043.20 | 24852.68  | /        | /       |
|                    | #4              | 61631.79                                                                                       | 37125.55 | 122997.11 | 221303.11 | 19422.89 | 2958.24 |
|                    | #5              | 2718457.00                                                                                     | 28256.99 | 328867.31 | /         | /        | /       |
|                    | #6              | 39420.21                                                                                       | /        | /         | /         | /        | /       |

The serum data of #4 recipient is provided in the Figure 3B of the manuscript.

/ There were no data collected.

N The serum was not enough for qPCR analysis of HBV DNA.

\* The value was below the lower limit detection (0.05 IU/mL).

The cutoff of HBeAg  $\geq 1.0$  is positive.

The value of ALT > 50 IU/mL is positive.

Mouse #6 at day two, #5 at day seven, #3 at day 14 was euthanized to collect hepatic tissue sample, respectively.
